# Supplementary material for: The Impact of Healthy Lifestyles on Late Sequelae in Classical Hodgkin Lymphoma and Diffuse Large B-Cell Lymphoma Survivors. A Systematic Review by the Fondazione Italiana Linfomi
Source: MDPI journal article supplement (doi:10.3390/cancers13133135), 2021-06-23
Supplement: s1 [file s1]

Supplementary Material 1: **Example of search strategy used in MedLine and adapted to search the other databases.**

- PICO physical exercise

MedLine, Embase, and Cochrane databases up to September 2019

(((((("Sedentary Behavior"[Mesh]) OR Sedentary Behavior) OR physical activity) OR "Exercise"[Mesh]) OR physical exercise) OR ((lifestyle) OR "Life Style"[Mesh]))) AND (((((Lymphoma, Large B-Cell, Diffuse) OR "Lymphoma, Large B-Cell, Diffuse"[Mesh])) OR ((hodgkin lymphoma) OR "Hodgkin Disease"[Mesh]) OR hodgkin disease))) AND (("Cancer Survivors"[Mesh]) OR (cancer long term survivors))

- PICO nutrition and BMI

MedLine, Embase, and Cochrane databases up to September 2019

((((((((((("Hodgkin Disease"[Mesh]) OR hodgkin disease) OR hodgkin lymphoma)) OR ("Lymphoma, Large B-Cell, Diffuse"[Mesh]) OR Lymphoma, Large B-Cell, Diffuse))) AND ((cancer long term survivors) OR "Cancer Survivors"[Mesh]))) AND (((((Diet, Mediterranean[MeSH Terms]) OR diet[MeSH Major Topic]) OR "mediterranean diet") OR "Nutrition Therapy"[Mesh])) OR ((body mass index) OR body mass index[MeSH Terms]))

- PICO Dietary Supplements

MedLine, Embase, and Cochrane databases up to September 2019

(((((("Cancer Survivors"[Mesh]) OR cancer long term survivors)) AND (((((hodgkin lymphoma) OR hodgkin disease) OR "Hodgkin Disease"[Mesh]) OR lymphoma large B-cell diffuse) OR "Lymphoma, Large B-Cell, Diffuse"[Mesh]))) AND (((((((dietary supplement) OR "Dietary Supplements"[Mesh]) OR essential fatty acids) OR "Fatty Acids, Essential"[Mesh]) OR vitamin) OR "Micronutrients"[Mesh]) OR "Amino Acids, Essential"[Mesh]) OR phytochemicals) OR "Phytochemicals"[Mesh] OR "natural supplements"))

- PICO cognitive decline

MedLine, Embase, and Cochrane databases up to October 2019

(((((("hodgkin disease" OR hodgkin disease[mh] OR Lymphoma, Large B-Cell, Diffuse[MH] OR

DLBCL[TIAB] OR "diffuse large B cell lymphoma" OR "HODGKIN LYMPHOMA") AND ("surviv\*" OR "long term survivor" OR "survivorship" OR cancer survivors[Mesh])) AND ((((((Cognition Disorders[MH] OR Neurobehavioral Manifestations[mh] OR Attention[MH] OR Cognition[mh] OR Neuropsychological Tests[mh] OR Executive Function[MH] OR "executive functions"[tiab] OR ((cognit\* OR neurocognit\* OR neuropsycholog\* OR memory OR neurobehavior\* OR neurobehaviour\*) AND (impair\* OR deficit\* OR declin\* OR disorder\* OR function\* OR dysfunction\* OR decrement\* OR disturb\* OR problem\* OR sequelae\* OR assess\*)))))) OR (((("Anxiety"[Mesh] OR "Anxiety Disorders"[Mesh] OR anxi\*[tiab] OR "Depression"[Mesh] OR depression[tiab] OR depressive[tiab] OR "Mood Disorders"[Mesh])))) OR ((sleep disorder) OR 'sleep disorder'[MeSH Terms]) OR (((((((("Exercise"[Mesh] OR physical exercise) OR physical activity) OR "Sedentary Behavior"[Mesh] OR "Sedentary Behavior"))))))

- PICO survivor cancer plan

MedLine, Embase, and Cochrane databases up to October 2019

((survivor cancer plan OR survivorship care plans)) AND (((("hodgkin disease" OR hodgkin disease[mh] OR Lymphoma, Large B-Cell, Diffuse[MH] OR DLBCL[TIAB] OR "diffuse large B cell lymphoma" OR "HODGKIN LYMPHOMA") AND ("surviv\*" OR "long term survivor" OR "survivorship" OR cancer survivors[Mesh]))))
